# Supplementary material for: MYC and MET cooperatively drive hepatocellular carcinoma with distinct molecular traits and vulnerabilities
Source: PubMed Central journal article supplement (PMC9700715; doi:10.1038/s41419-022-05411-6), 2022-11-24

**A**  $MYC^{high}/MET^{high}$   $MYC^{low}/MET^{high}$   $MYC^{high}/MET^{low}$   $MYC^{low}/MET^{low}$ 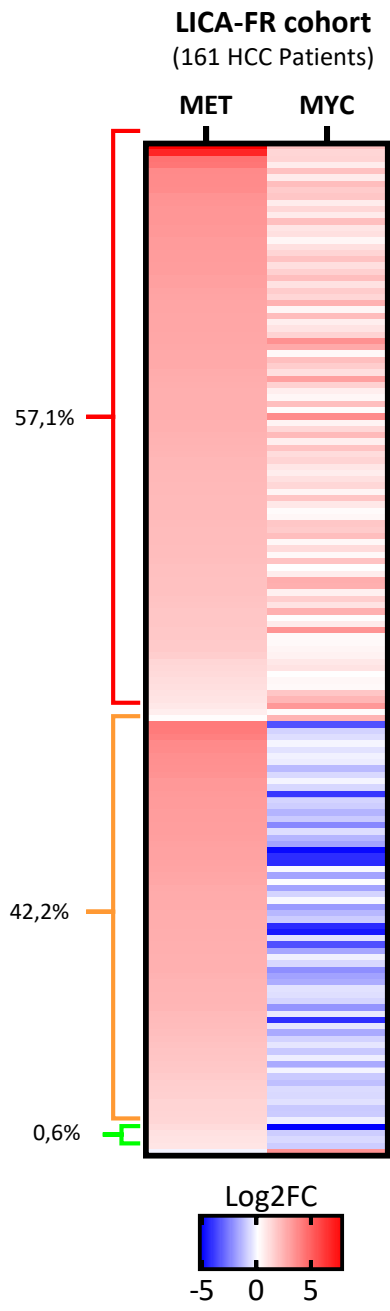

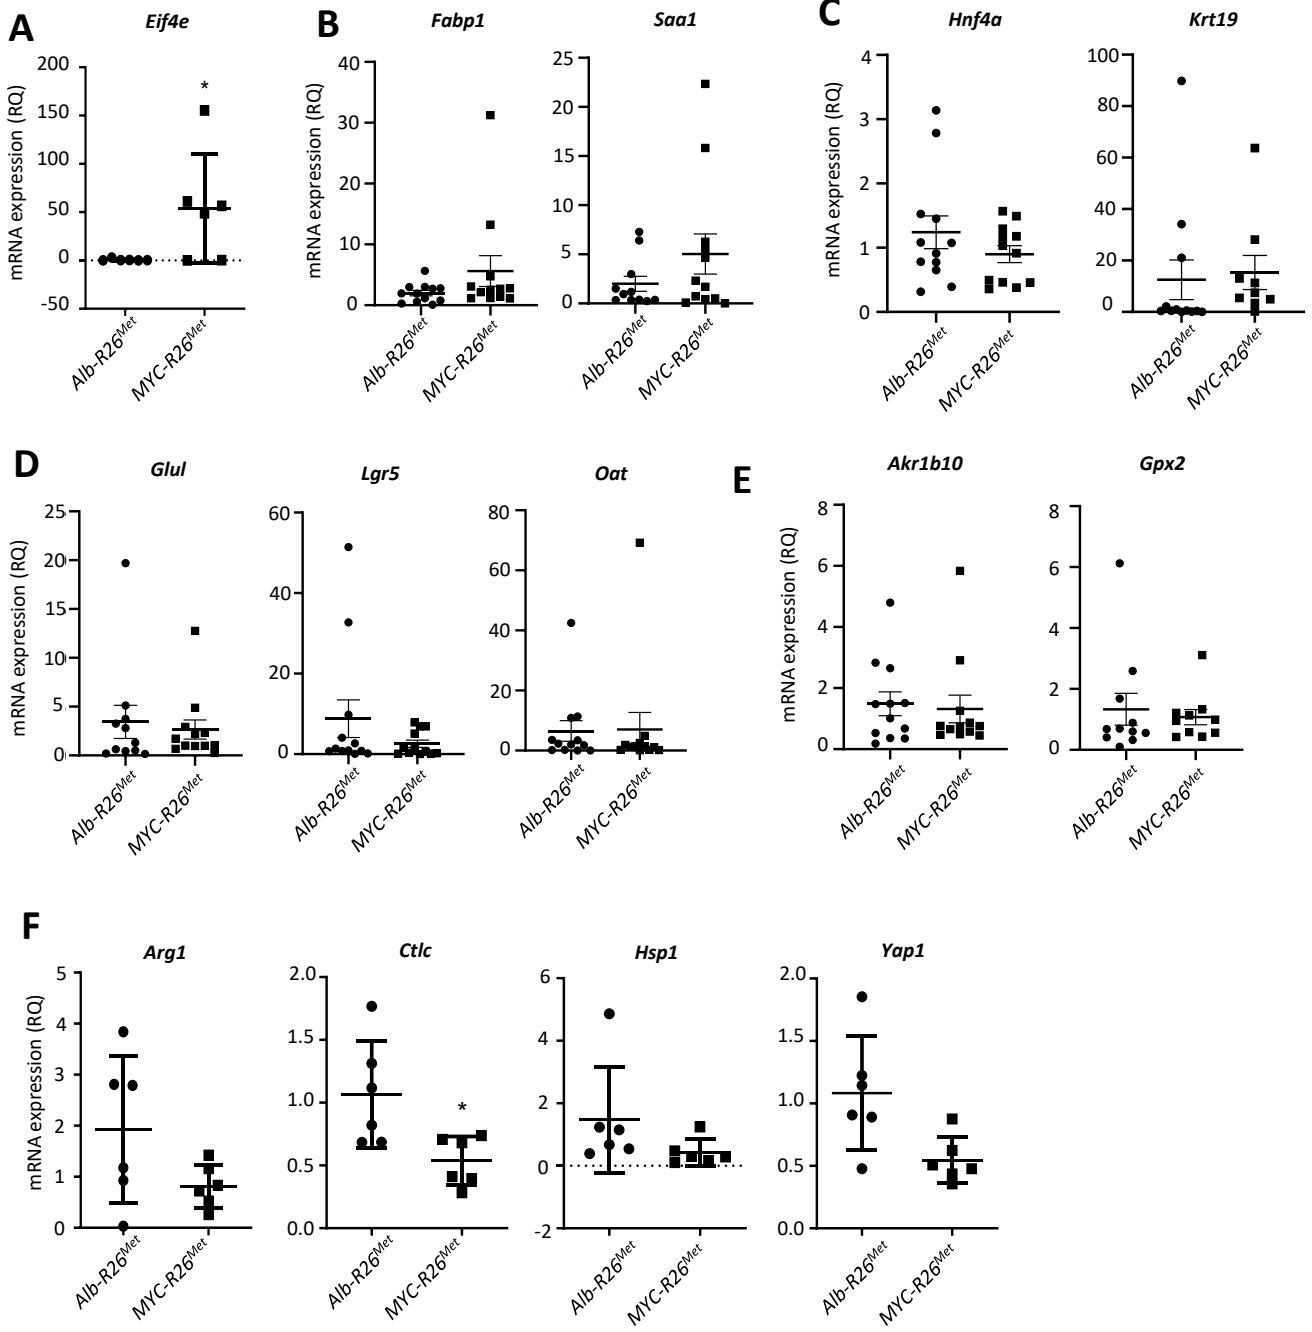

Figure S2

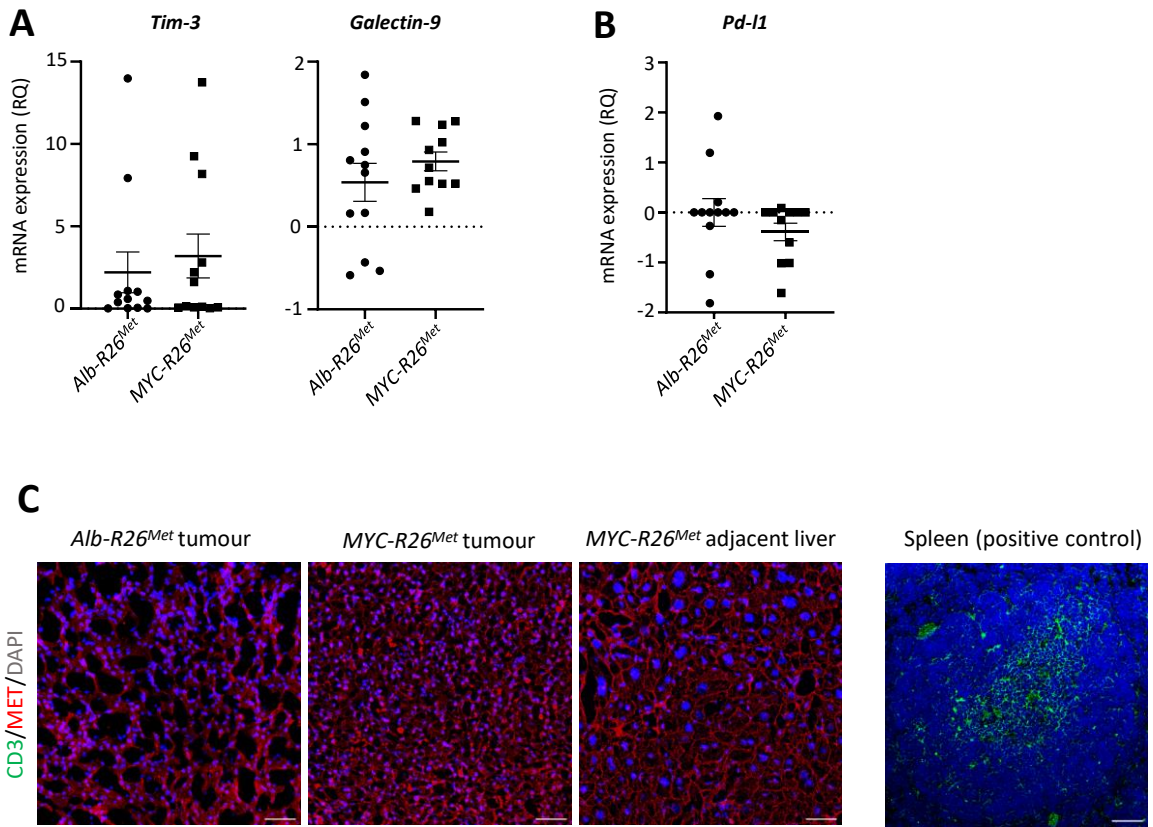

Figure S3

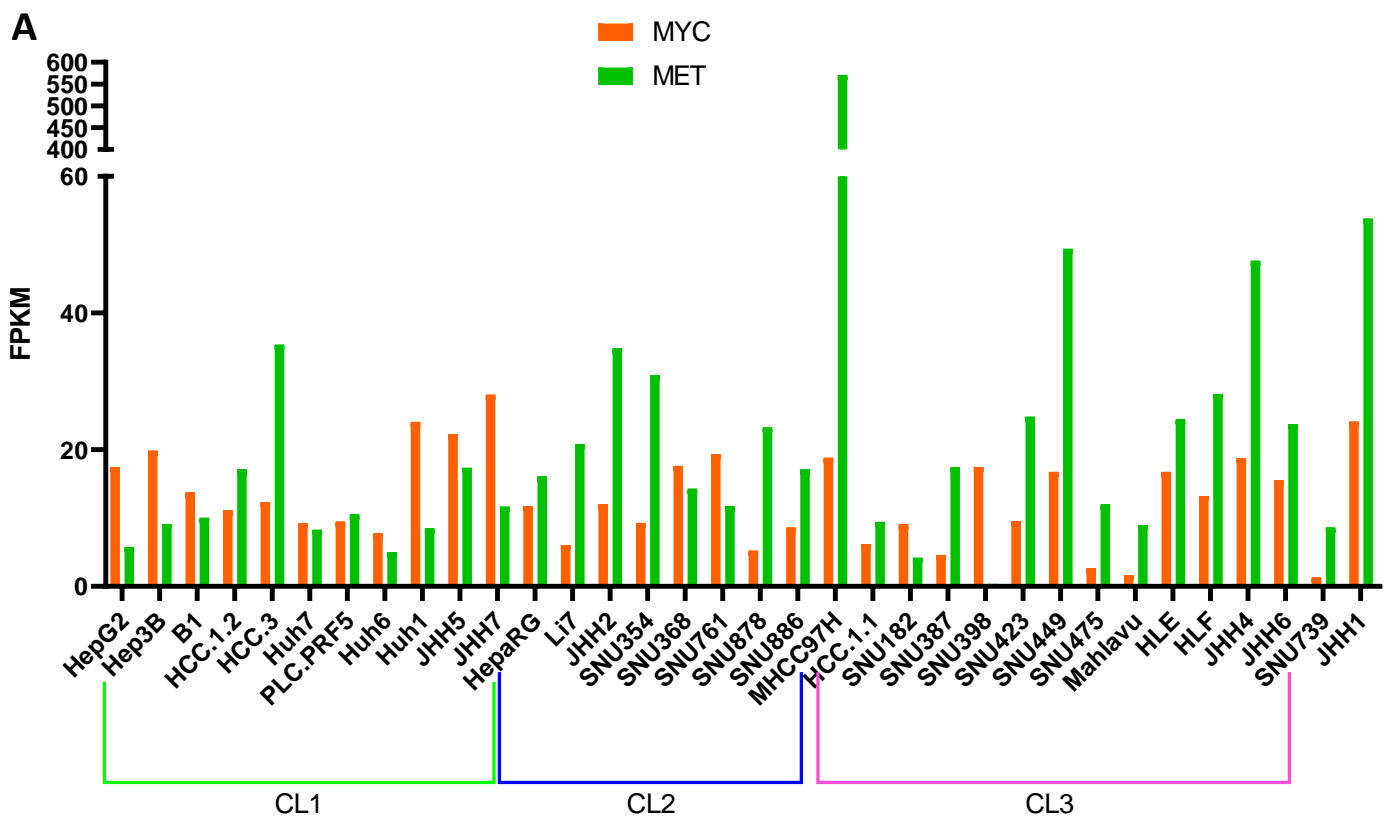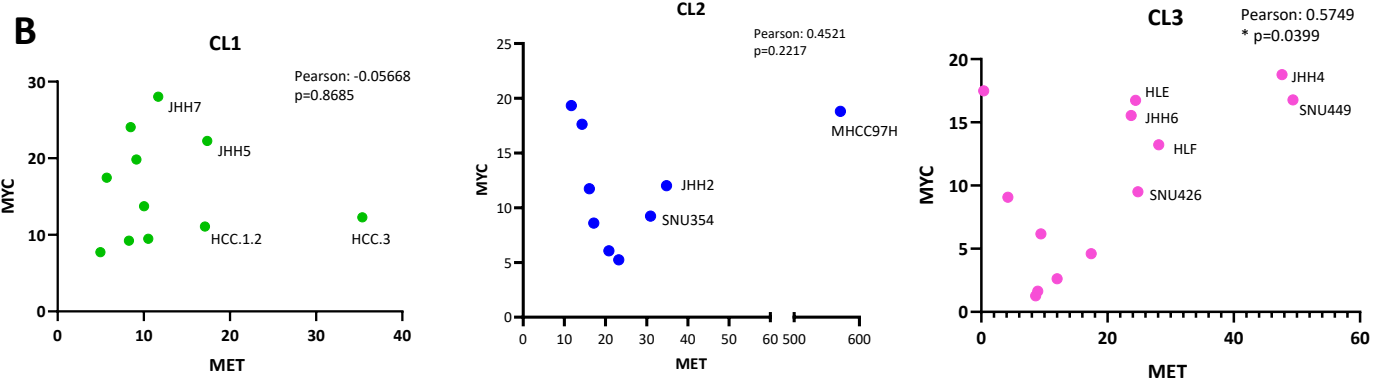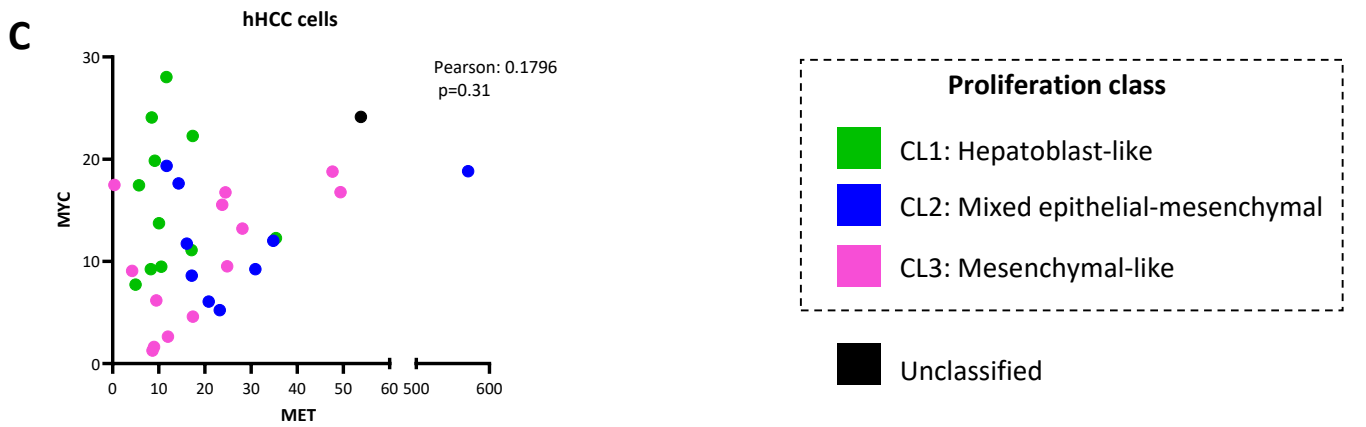

Figure S4

**A**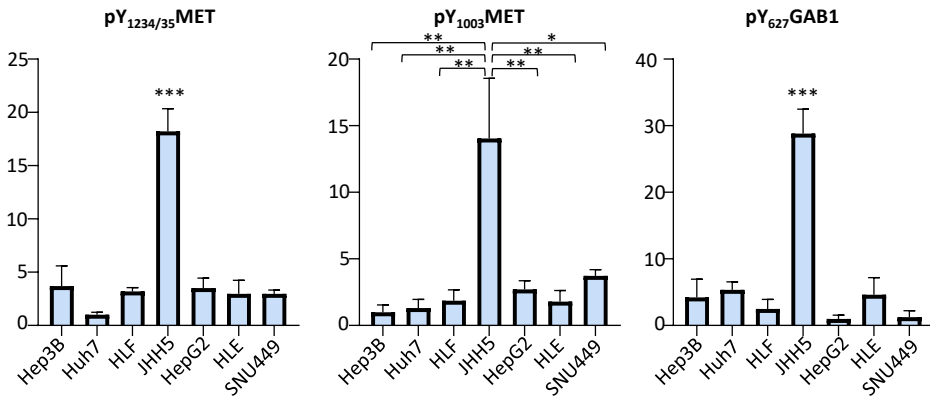**B**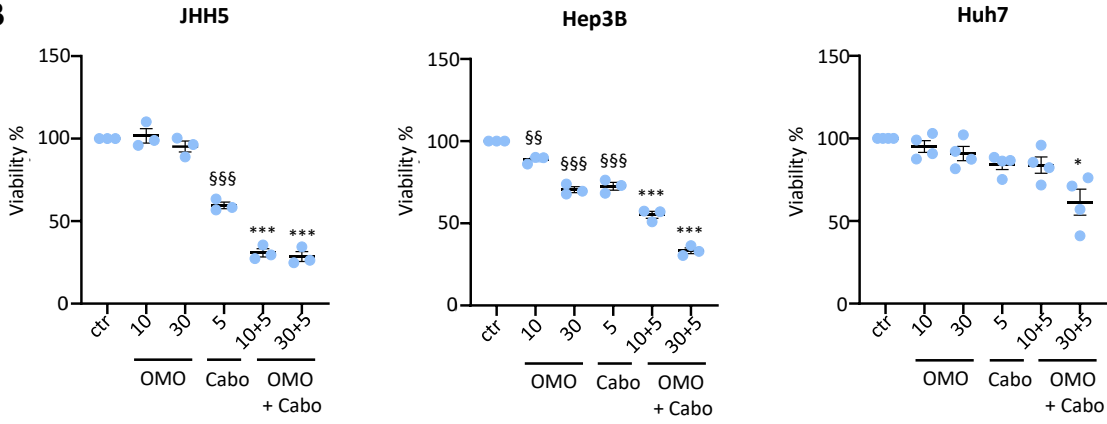

Supplement: 41419_2022_5411_MOESM2_ESM.pdf [file 41419_2022_5411_MOESM2_ESM.pdf]
