# Supplementary material for: MYC and MET cooperatively drive hepatocellular carcinoma with distinct molecular traits and vulnerabilities
Source: PubMed Central journal article supplement (PMC9700715; doi:10.1038/s41419-022-05411-6), 2022-11-24
Supplement: 41419_2022_5411_MOESM6_ESM.pdf [file 41419_2022_5411_MOESM6_ESM.pdf]

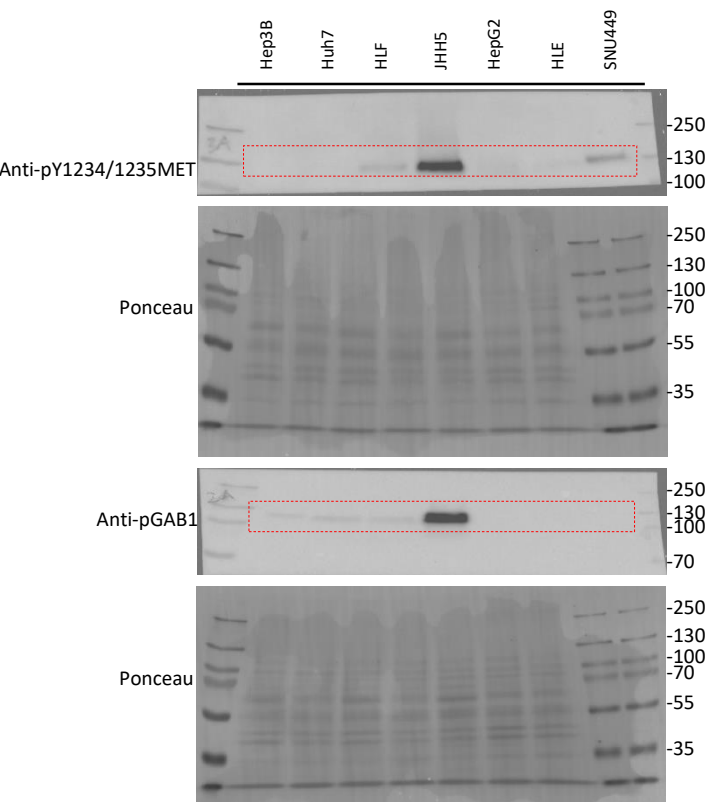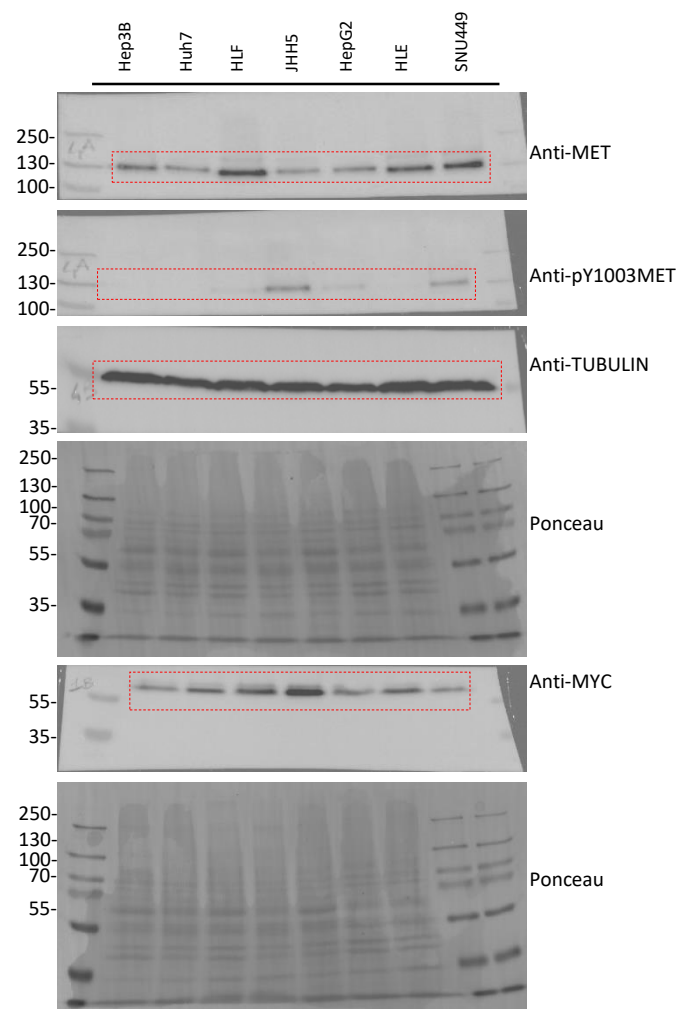

**Figure S6**

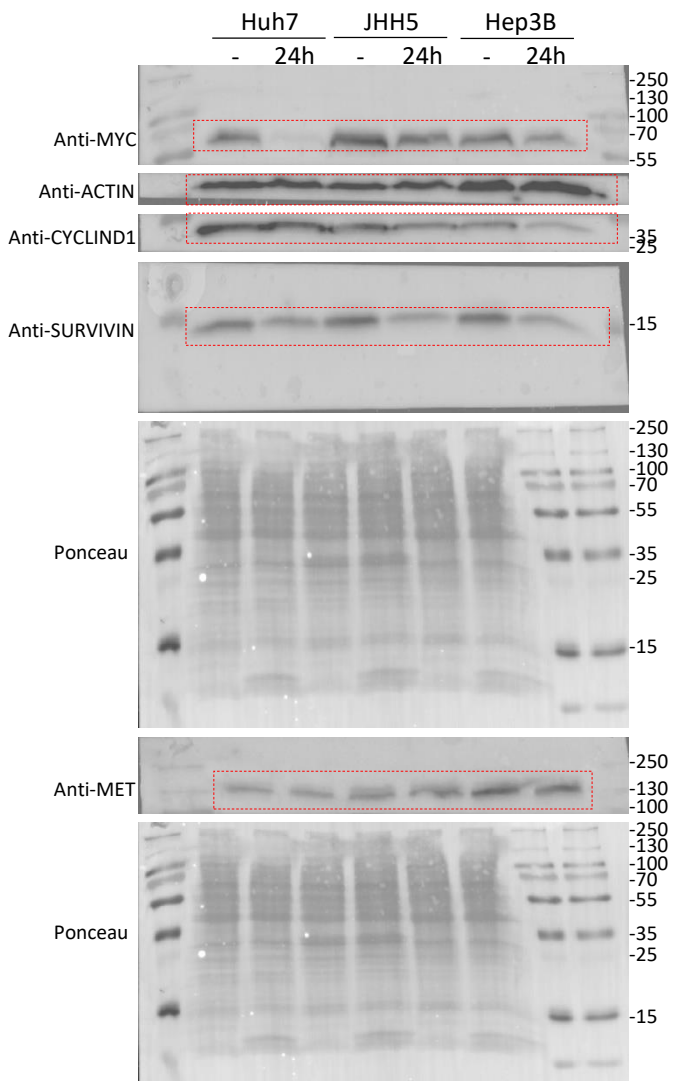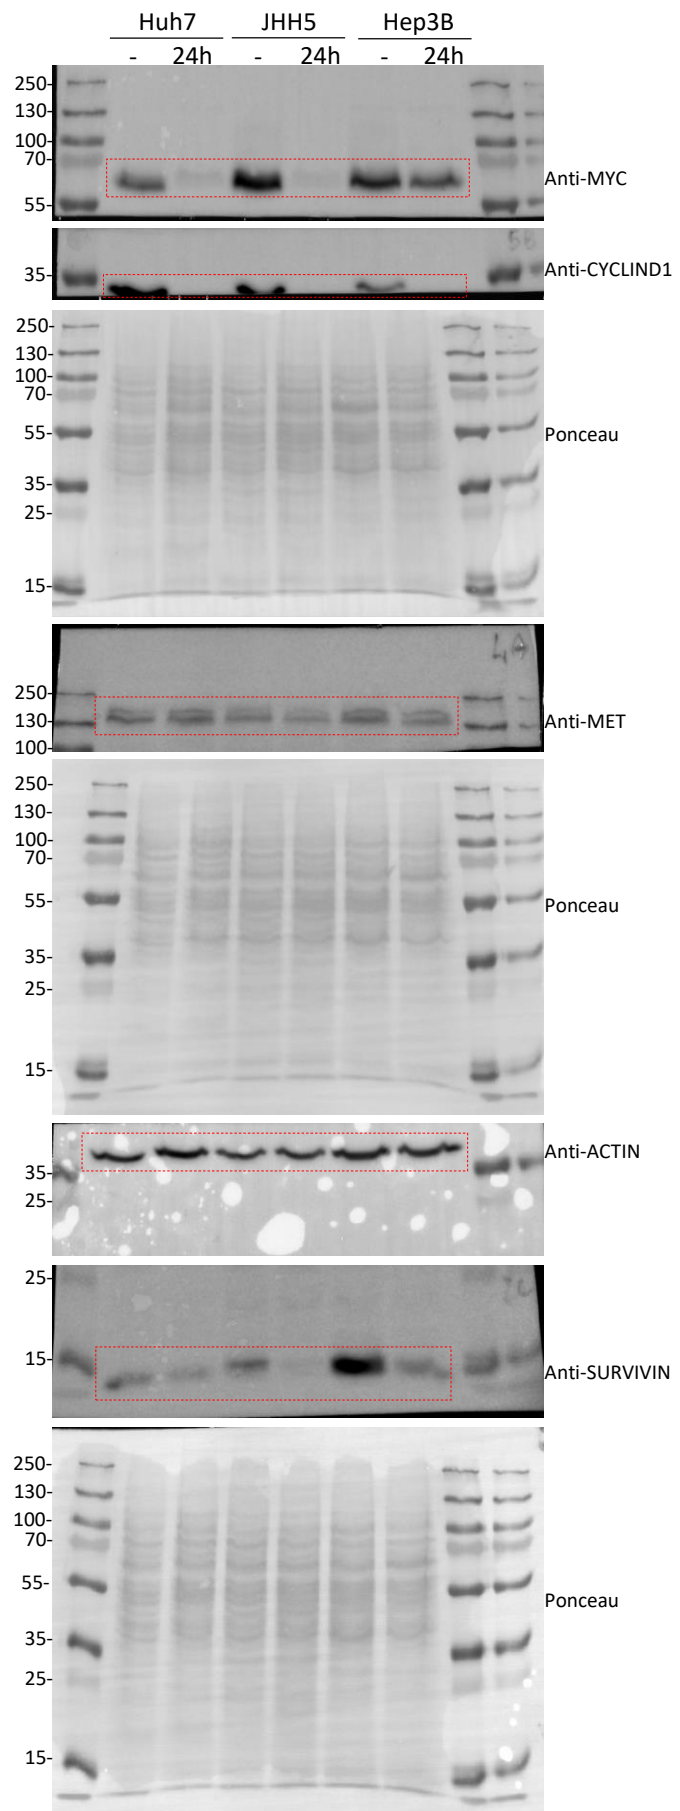

Figure S7

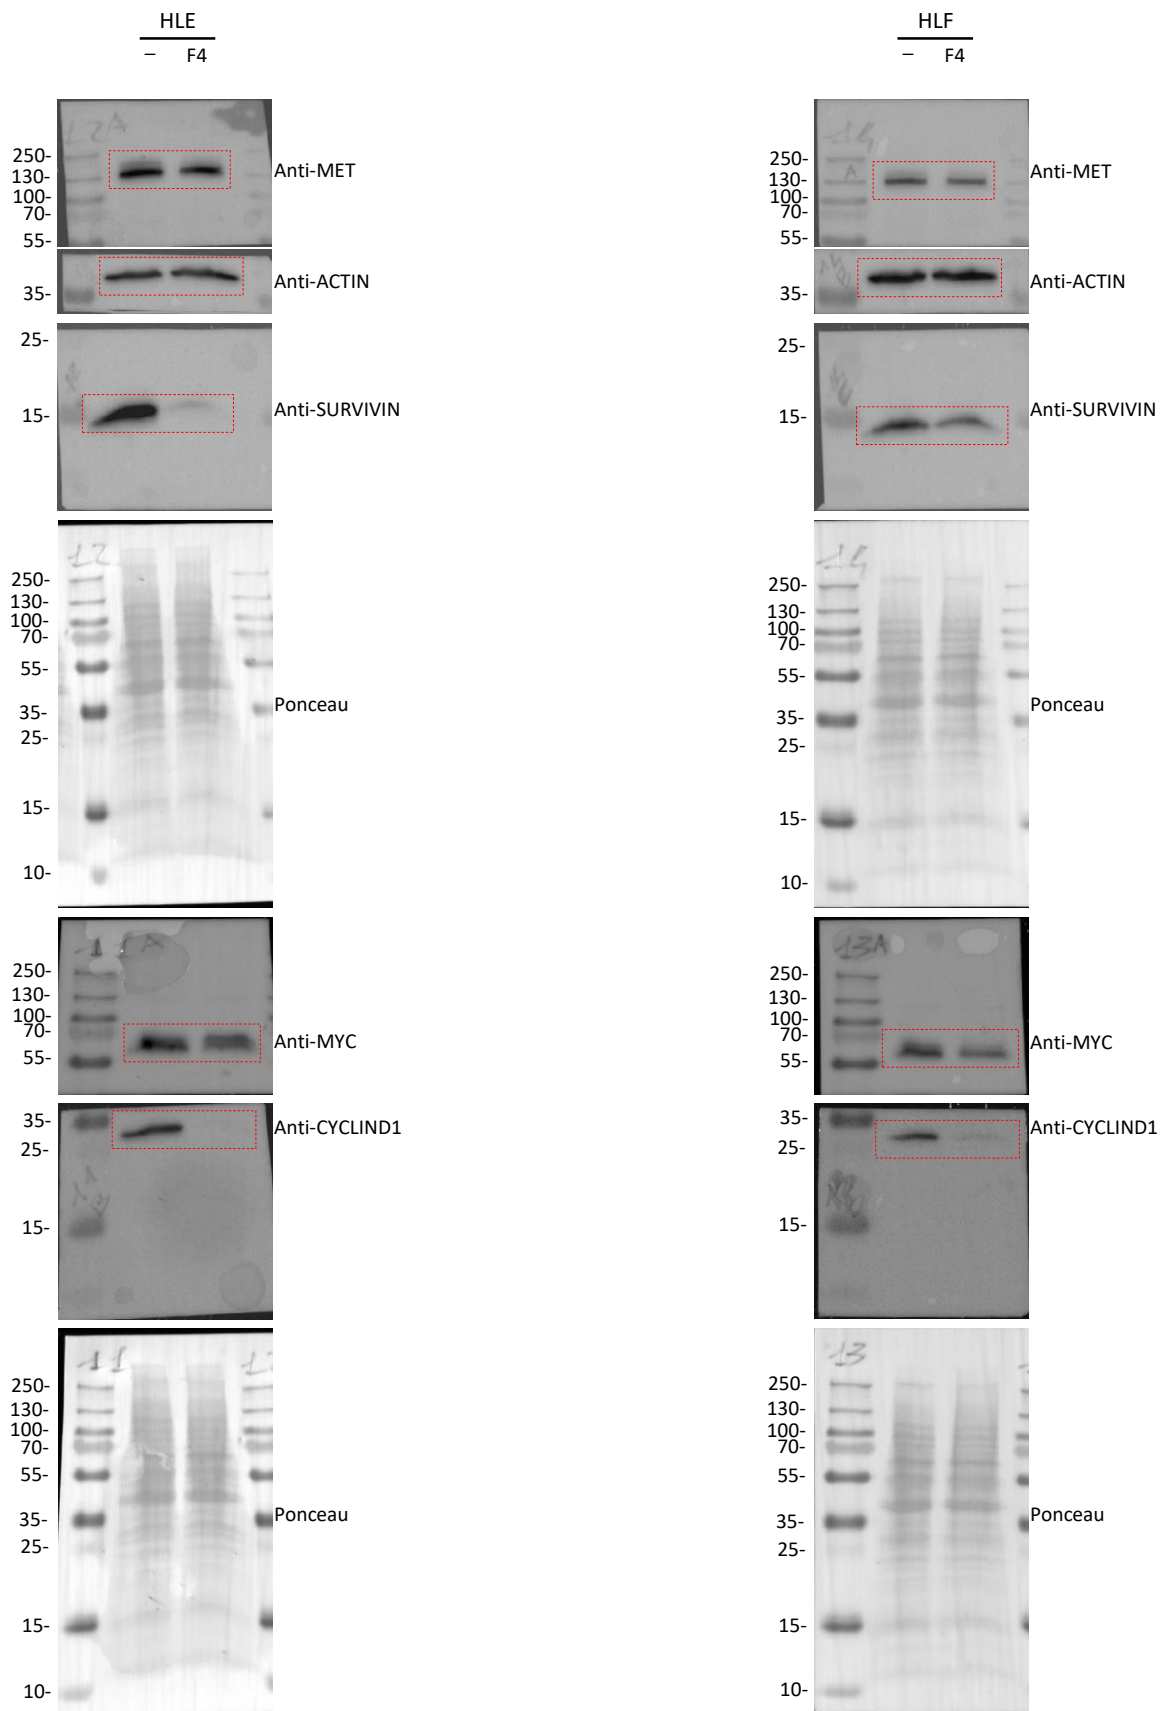

Figure S8
